# Supplementary material
Source: MDPI journal article supplement (https://www.mdpi.com/2073-4336/1/3/189)
Supplement: s1 [file s1]

(* Content-type: application/mathematica *)

(*** Wolfram Notebook File ***)
(* http://www.wolfram.com/nb *)

(* CreatedBy='Mathematica 7.0' *)

(*CacheID: 234*)
(* Internal cache information:
NotebookFileLineBreakTest
NotebookFileLineBreakTest
NotebookDataPosition[       145,          7]
NotebookDataLength[     25785,        703]
NotebookOptionsPosition[     24780,        666]
NotebookOutlinePosition[     25174,        683]
CellTagsIndexPosition[     25131,        680]
WindowFrame->Normal*)

(* Beginning of Notebook Content *)
Notebook[{
Cell[BoxData[
 RowBox[{
  RowBox[{"(*", " ", 
   RowBox[{"definition", " ", "of", " ", "used", " ", "expressions"}], " ", 
   "*)"}], "\[IndentingNewLine]", 
  RowBox[{
   RowBox[{
    RowBox[{"A", "=", 
     RowBox[{"{", 
      RowBox[{
       RowBox[{"{", 
        RowBox[{"0", ",", 
         RowBox[{"-", "c2"}], ",", "t3", ",", "e4"}], "}"}], ",", 
       RowBox[{"{", 
        RowBox[{"e1", ",", "0", ",", 
         RowBox[{"-", "c3"}], ",", "t4"}], "}"}], ",", 
       RowBox[{"{", 
        RowBox[{"t1", ",", "e2", ",", "0", ",", 
         RowBox[{"-", "c4"}]}], "}"}], ",", 
       RowBox[{"{", 
        RowBox[{
         RowBox[{"-", "c1"}], ",", "t2", ",", "e3", ",", "0"}], "}"}]}], 
      "}"}]}], ";"}], "\[IndentingNewLine]", 
   RowBox[{
    RowBox[{"A24", "=", 
     RowBox[{"Det", "[", 
      RowBox[{"{", 
       RowBox[{
        RowBox[{"{", 
         RowBox[{"0", ",", 
          RowBox[{"-", "c2"}], ",", "t3"}], "}"}], ",", 
        RowBox[{"{", 
         RowBox[{"t1", ",", "e2", ",", "0"}], "}"}], ",", 
        RowBox[{"{", 
         RowBox[{
          RowBox[{"-", "c1"}], ",", "t2", ",", "e3"}], "}"}]}], "}"}], 
      "]"}]}], ";"}], "\[IndentingNewLine]", 
   RowBox[{
    RowBox[{"A14", "=", 
     RowBox[{"Det", "[", 
      RowBox[{"{", 
       RowBox[{
        RowBox[{"{", 
         RowBox[{"e1", ",", "0", ",", 
          RowBox[{"-", "c3"}]}], "}"}], ",", 
        RowBox[{"{", 
         RowBox[{"t1", ",", "e2", ",", "0"}], "}"}], ",", 
        RowBox[{"{", 
         RowBox[{
          RowBox[{"-", "c1"}], ",", "t2", ",", "e3"}], "}"}]}], "}"}], 
      "]"}]}], ";"}], "\[IndentingNewLine]", 
   RowBox[{
    RowBox[{"An", "=", 
     RowBox[{"{", 
      RowBox[{
       RowBox[{"{", 
        RowBox[{"0", ",", 
         RowBox[{"-", "c2"}], ",", "t3", ",", "1"}], "}"}], ",", 
       RowBox[{"{", 
        RowBox[{"e1", ",", "0", ",", 
         RowBox[{"-", "c3"}], ",", "1"}], "}"}], ",", 
       RowBox[{"{", 
        RowBox[{"t1", ",", "e2", ",", "0", ",", "1"}], "}"}], ",", 
       RowBox[{"{", 
        RowBox[{
         RowBox[{"-", "c1"}], ",", "t2", ",", "e3", ",", "1"}], "}"}]}], 
      "}"}]}], ";"}], "\[IndentingNewLine]", 
   RowBox[{
    RowBox[{"e", "=", 
     RowBox[{"e1", " ", "e2", " ", "e3", " ", "e4"}]}], ";"}], 
   "\[IndentingNewLine]", 
   RowBox[{
    RowBox[{"c", "=", 
     RowBox[{"c1", " ", "c2", " ", "c3", " ", "c4"}]}], ";"}], 
   "\[IndentingNewLine]", 
   RowBox[{
    RowBox[{"sigma1", "=", 
     RowBox[{"-", 
      RowBox[{"(", 
       RowBox[{
        RowBox[{"c1", " ", "e2", " ", "t3"}], "+", 
        RowBox[{"c2", " ", "e3", " ", "t1"}], "+", 
        RowBox[{"t1", " ", "t2", " ", "t3"}]}], ")"}]}]}], ";"}], 
   "\[IndentingNewLine]", 
   RowBox[{
    RowBox[{"sigma2", "=", 
     RowBox[{"-", 
      RowBox[{"(", 
       RowBox[{
        RowBox[{"c2", " ", "e3", " ", "t4"}], "+", 
        RowBox[{"c3", " ", "e4", " ", "t2"}], "+", 
        RowBox[{"t2", " ", "t3", " ", "t4"}]}], ")"}]}]}], ";"}], 
   "\[IndentingNewLine]", 
   RowBox[{
    RowBox[{"q", "=", 
     RowBox[{
      RowBox[{"(", 
       RowBox[{
        SqrtBox["e"], "-", 
        SqrtBox["c"]}], ")"}], "^", "2"}]}], ";"}]}]}]], "Input",
 CellChangeTimes->{{3.488077304895317*^9, 3.488077361915703*^9}, {
  3.488077417219925*^9, 3.488077439563257*^9}, {3.488077477531312*^9, 
  3.488077548054965*^9}, {3.488077665343391*^9, 3.4880776657340527`*^9}, {
  3.488079267949993*^9, 3.4880793078419456`*^9}, {3.488079426631213*^9, 
  3.4880794271903048`*^9}, {3.488093953748184*^9, 3.488093966851385*^9}, {
  3.488094314762362*^9, 3.488094315528173*^9}}],

Cell[CellGroupData[{

Cell[BoxData[
 RowBox[{"MatrixForm", "[", "A", "]"}]], "Input",
 CellChangeTimes->{{3.488077512964491*^9, 3.488077517566905*^9}, 
   3.4880943218997087`*^9}],

Cell[BoxData[
 TagBox[
  RowBox[{"(", "\[NoBreak]", GridBox[{
     {"0", 
      RowBox[{"-", "c2"}], "t3", "e4"},
     {"e1", "0", 
      RowBox[{"-", "c3"}], "t4"},
     {"t1", "e2", "0", 
      RowBox[{"-", "c4"}]},
     {
      RowBox[{"-", "c1"}], "t2", "e3", "0"}
    },
    GridBoxAlignment->{
     "Columns" -> {{Center}}, "ColumnsIndexed" -> {}, "Rows" -> {{Baseline}}, 
      "RowsIndexed" -> {}},
    GridBoxSpacings->{"Columns" -> {
        Offset[0.27999999999999997`], {
         Offset[0.7]}, 
        Offset[0.27999999999999997`]}, "ColumnsIndexed" -> {}, "Rows" -> {
        Offset[0.2], {
         Offset[0.4]}, 
        Offset[0.2]}, "RowsIndexed" -> {}}], "\[NoBreak]", ")"}],
  Function[BoxForm`e$, 
   MatrixForm[BoxForm`e$]]]], "Output",
 CellChangeTimes->{3.4880775183021593`*^9}]
}, Open  ]],

Cell[CellGroupData[{

Cell[BoxData[
 RowBox[{
  RowBox[{"(*", " ", 
   RowBox[{"Lemma", " ", "21"}], " ", "*)"}], " ", "\[IndentingNewLine]", 
  RowBox[{"(*", " ", 
   RowBox[{
   "The", " ", "first", " ", "two", " ", "lines", " ", "show", " ", "that", 
    " ", "there", " ", "are", " ", "solutions", " ", "for", " ", "the", " ", 
    "system"}], " ", "*)"}], "\[IndentingNewLine]", 
  RowBox[{
   RowBox[{"FindInstance", "[", 
    RowBox[{
     RowBox[{"{", 
      RowBox[{
       RowBox[{"e1", ">", "0"}], ",", 
       RowBox[{"e2", ">", "0"}], ",", 
       RowBox[{"e3", ">", "0"}], ",", 
       RowBox[{"e4", ">", "0"}], ",", 
       RowBox[{"c1", ">", "0"}], ",", 
       RowBox[{"c2", ">", "0"}], ",", 
       RowBox[{"c3", ">", "0"}], ",", 
       RowBox[{"c4", ">", "0"}], ",", 
       RowBox[{"t1", "<", "0"}], ",", 
       RowBox[{"t2", "<", "0"}], ",", 
       RowBox[{"t3", ">", "0"}], ",", 
       RowBox[{"t4", "<", "0"}], ",", 
       RowBox[{
        RowBox[{"Det", "[", "A", "]"}], ">", "0"}]}], "}"}], ",", 
     RowBox[{"{", 
      RowBox[{
      "e1", ",", "e2", ",", "e3", ",", "e4", ",", "c1", ",", "c2", ",", "c3", 
       ",", "c4", ",", "t1", ",", "t2", ",", "t3", ",", "t4"}], "}"}]}], 
    "]"}], "\[IndentingNewLine]", 
   RowBox[{"FindInstance", "[", 
    RowBox[{
     RowBox[{"{", 
      RowBox[{
       RowBox[{"e1", ">", "0"}], ",", 
       RowBox[{"e2", ">", "0"}], ",", 
       RowBox[{"e3", ">", "0"}], ",", 
       RowBox[{"e4", ">", "0"}], ",", 
       RowBox[{"c1", ">", "0"}], ",", 
       RowBox[{"c2", ">", "0"}], ",", 
       RowBox[{"c3", ">", "0"}], ",", 
       RowBox[{"c4", ">", "0"}], ",", 
       RowBox[{"t1", "<", "0"}], ",", 
       RowBox[{"t2", "<", "0"}], ",", 
       RowBox[{"t3", ">", "0"}], ",", 
       RowBox[{"t4", "<", "0"}], ",", 
       RowBox[{"e", "<", "c"}]}], "}"}], ",", 
     RowBox[{"{", 
      RowBox[{
      "e1", ",", "e2", ",", "e3", ",", "e4", ",", "c1", ",", "c2", ",", "c3", 
       ",", "c4", ",", "t1", ",", "t2", ",", "t3", ",", "t4"}], "}"}]}], 
    "]"}], "\[IndentingNewLine]", 
   RowBox[{"(*", " ", 
    RowBox[{
    "The", " ", "next", " ", "two", " ", "lines", " ", "show", " ", "that", 
     " ", "sigma2", " ", "cannot", " ", "be", " ", "smaller", " ", "or", " ", 
     "equal", " ", "than", " ", "0", " ", "and", " ", "hence", " ", "has", 
     " ", "to", " ", "be", " ", "greater", " ", "than", " ", "0.", " ", 
     "From", " ", "this", " ", "it", " ", "follows", " ", "directly", " ", 
     "that", " ", "d2", " ", "has", " ", "to", " ", "be", " ", "greater", " ",
      "than", " ", "zero"}], " ", "*)"}], "\[IndentingNewLine]", 
   RowBox[{"Reduce", "[", 
    RowBox[{"{", 
     RowBox[{
      RowBox[{"e1", ">", "0"}], ",", 
      RowBox[{"e2", ">", "0"}], ",", 
      RowBox[{"e3", ">", "0"}], ",", 
      RowBox[{"e4", ">", "0"}], ",", 
      RowBox[{"c1", ">", "0"}], ",", 
      RowBox[{"c2", ">", "0"}], ",", 
      RowBox[{"c3", ">", "0"}], ",", 
      RowBox[{"c4", ">", "0"}], ",", 
      RowBox[{"t1", "<", "0"}], ",", 
      RowBox[{"t2", "<", "0"}], ",", 
      RowBox[{"t3", ">", "0"}], ",", 
      RowBox[{"t4", "<", "0"}], ",", 
      RowBox[{"sigma1", ">", "0"}], ",", 
      RowBox[{"sigma2", "\[LessEqual]", "0"}]}], "}"}], "]"}], 
   "\[IndentingNewLine]", 
   RowBox[{"Reduce", "[", 
    RowBox[{"{", 
     RowBox[{
      RowBox[{"e1", ">", "0"}], ",", 
      RowBox[{"e2", ">", "0"}], ",", 
      RowBox[{"e3", ">", "0"}], ",", 
      RowBox[{"e4", ">", "0"}], ",", 
      RowBox[{"c1", ">", "0"}], ",", 
      RowBox[{"c2", ">", "0"}], ",", 
      RowBox[{"c3", ">", "0"}], ",", 
      RowBox[{"c4", ">", "0"}], ",", 
      RowBox[{"t1", "<", "0"}], ",", 
      RowBox[{"t2", "<", "0"}], ",", 
      RowBox[{"t3", ">", "0"}], ",", 
      RowBox[{"t4", "<", "0"}], ",", 
      RowBox[{"sigma1", ">", "0"}], ",", 
      RowBox[{
       RowBox[{
        RowBox[{
         RowBox[{"e3", "^", "2"}], " ", 
         RowBox[{"e4", "^", "2"}]}], "+", 
        RowBox[{"c2", " ", "e2", " ", 
         RowBox[{"e3", "^", "2"}]}], "-", 
        RowBox[{"e2", " ", 
         RowBox[{"e4", "^", "2"}], " ", "t2"}]}], "\[LessEqual]", 
       RowBox[{
        RowBox[{"-", "e2"}], " ", "e3", " ", "t2", " ", "t3"}]}]}], "}"}], 
    "]"}], "\[IndentingNewLine]", 
   RowBox[{"(*", " ", 
    RowBox[{
    "FindInstance", " ", "is", " ", "much", " ", "faster", " ", "and", " ", 
     "so", " ", "was", " ", "used", " ", "instead", " ", "of", " ", 
     RowBox[{"Reduce", ".", " ", "Again"}], " ", "it", " ", "is", " ", 
     "shown", " ", "that", " ", "d2", " ", "has", " ", "to", " ", "be", " ", 
     "greater", " ", "than", " ", 
     RowBox[{"zero", "."}]}], " ", "*)"}], "\[IndentingNewLine]", 
   RowBox[{"FindInstance", "[", 
    RowBox[{
     RowBox[{"{", 
      RowBox[{
       RowBox[{"e1", ">", "0"}], ",", 
       RowBox[{"e2", ">", "0"}], ",", 
       RowBox[{"e3", ">", "0"}], ",", 
       RowBox[{"e4", ">", "0"}], ",", 
       RowBox[{"c1", ">", "0"}], ",", 
       RowBox[{"c2", ">", "0"}], ",", 
       RowBox[{"c3", ">", "0"}], ",", 
       RowBox[{"c4", ">", "0"}], ",", 
       RowBox[{"t1", "<", "0"}], ",", 
       RowBox[{"t2", "<", "0"}], ",", 
       RowBox[{"t3", ">", "0"}], ",", 
       RowBox[{"t4", "<", "0"}], ",", 
       RowBox[{"sigma1", "<", "0"}], ",", 
       RowBox[{"sigma2", ">", "0"}], ",", 
       RowBox[{
        RowBox[{"Det", "[", "A", "]"}], ">", "0"}], ",", 
       RowBox[{
        RowBox[{"Det", "[", "A", "]"}], ">", 
        RowBox[{"e", "-", "c", "+", 
         RowBox[{"2", " ", "t4", " ", "A24"}], "-", 
         RowBox[{"2", "e4", " ", "A14"}]}]}], ",", 
       RowBox[{
        RowBox[{
         RowBox[{
          RowBox[{"e3", "^", "2"}], " ", 
          RowBox[{"e4", "^", "2"}]}], "+", 
         RowBox[{"c2", " ", "e2", " ", 
          RowBox[{"e3", "^", "2"}]}], "-", 
         RowBox[{"e2", " ", 
          RowBox[{"e4", "^", "2"}], " ", "t2"}]}], "\[LessEqual]", 
        RowBox[{
         RowBox[{"-", "e2"}], " ", "e3", " ", "t2", " ", "t3"}]}]}], "}"}], 
     ",", 
     RowBox[{"{", 
      RowBox[{
      "e1", ",", "e2", ",", "e3", ",", "e4", ",", "c1", ",", "c2", ",", "c3", 
       ",", "c4", ",", "t1", ",", "t2", ",", "t3", ",", "t4"}], "}"}]}], 
    "]"}], "\[IndentingNewLine]", 
   RowBox[{"FindInstance", "[", 
    RowBox[{
     RowBox[{"{", 
      RowBox[{
       RowBox[{"e1", ">", "0"}], ",", 
       RowBox[{"e2", ">", "0"}], ",", 
       RowBox[{"e3", ">", "0"}], ",", 
       RowBox[{"e4", ">", "0"}], ",", 
       RowBox[{"c1", ">", "0"}], ",", 
       RowBox[{"c2", ">", "0"}], ",", 
       RowBox[{"c3", ">", "0"}], ",", 
       RowBox[{"c4", ">", "0"}], ",", 
       RowBox[{"t1", "<", "0"}], ",", 
       RowBox[{"t2", "<", "0"}], ",", 
       RowBox[{"t3", ">", "0"}], ",", 
       RowBox[{"t4", "<", "0"}], ",", 
       RowBox[{"sigma2", ">", "0"}], ",", 
       RowBox[{
        RowBox[{"Det", "[", "A", "]"}], ">", 
        RowBox[{"e", "-", "c", "+", 
         RowBox[{"2", " ", "t4", " ", "A24"}], "-", 
         RowBox[{"2", "e4", " ", "A14"}]}]}], ",", 
       RowBox[{"e", "<", "c"}], ",", 
       RowBox[{
        RowBox[{"Det", "[", "A", "]"}], ">", 
        RowBox[{"-", "q"}]}], ",", 
       RowBox[{
        RowBox[{
         RowBox[{
          RowBox[{"e3", "^", "2"}], " ", 
          RowBox[{"e4", "^", "2"}]}], "+", 
         RowBox[{"c2", " ", "e2", " ", 
          RowBox[{"e3", "^", "2"}]}], "-", 
         RowBox[{"e2", " ", 
          RowBox[{"e4", "^", "2"}], " ", "t2"}]}], "\[LessEqual]", 
        RowBox[{
         RowBox[{"-", "e2"}], " ", "e3", " ", "t2", " ", "t3"}]}]}], "}"}], 
     ",", 
     RowBox[{"{", 
      RowBox[{
      "e1", ",", "e2", ",", "e3", ",", "e4", ",", "c1", ",", "c2", ",", "c3", 
       ",", "c4", ",", "t1", ",", "t2", ",", "t3", ",", "t4"}], "}"}]}], 
    "]"}], "\[IndentingNewLine]"}]}]], "Input",
 CellChangeTimes->{{3.488077724943424*^9, 3.488077846320321*^9}, {
   3.488077896137245*^9, 3.488077934430909*^9}, {3.4880779658727827`*^9, 
   3.48807801958887*^9}, {3.488078217381843*^9, 3.488078337534884*^9}, {
   3.488078370745227*^9, 3.488078376805971*^9}, {3.488079652806344*^9, 
   3.4880796668564463`*^9}, {3.488079737285469*^9, 3.488079772277811*^9}, {
   3.4880798064305763`*^9, 3.4880798375827703`*^9}, 3.4880800312822237`*^9, {
   3.488080205971936*^9, 3.488080214214698*^9}, {3.488080360601839*^9, 
   3.488080426051117*^9}, {3.488080456475009*^9, 3.488080521640439*^9}, {
   3.488093991866139*^9, 3.488093992087347*^9}}],

Cell[BoxData[
 RowBox[{"{", 
  RowBox[{"{", 
   RowBox[{
    RowBox[{"e1", "\[Rule]", 
     FractionBox["1", "32"]}], ",", 
    RowBox[{"e2", "\[Rule]", "1"}], ",", 
    RowBox[{"e3", "\[Rule]", 
     FractionBox["5", "8"]}], ",", 
    RowBox[{"e4", "\[Rule]", 
     FractionBox["1", "2"]}], ",", 
    RowBox[{"c1", "\[Rule]", 
     FractionBox["1", "16"]}], ",", 
    RowBox[{"c2", "\[Rule]", "1"}], ",", 
    RowBox[{"c3", "\[Rule]", "1"}], ",", 
    RowBox[{"c4", "\[Rule]", "1"}], ",", 
    RowBox[{"t1", "\[Rule]", 
     RowBox[{"-", "1"}]}], ",", 
    RowBox[{"t2", "\[Rule]", 
     RowBox[{"-", "1"}]}], ",", 
    RowBox[{"t3", "\[Rule]", "1"}], ",", 
    RowBox[{"t4", "\[Rule]", 
     RowBox[{"-", "1"}]}]}], "}"}], "}"}]], "Output",
 CellChangeTimes->{{3.488077826190303*^9, 3.488077847077849*^9}, {
   3.488077912299794*^9, 3.488077935100554*^9}, {3.48807796999067*^9, 
   3.488078020255827*^9}, {3.4880782770045013`*^9, 3.488078338153759*^9}, 
   3.488078377433839*^9, 3.488079667673655*^9, 3.488079773629365*^9, {
   3.488079813694503*^9, 3.48807983846771*^9}, 3.488080032999311*^9, 
   3.488091558224525*^9}],

Cell[BoxData[
 RowBox[{"{", 
  RowBox[{"{", 
   RowBox[{
    RowBox[{"e1", "\[Rule]", 
     FractionBox["1", "2"]}], ",", 
    RowBox[{"e2", "\[Rule]", "1"}], ",", 
    RowBox[{"e3", "\[Rule]", "1"}], ",", 
    RowBox[{"e4", "\[Rule]", "1"}], ",", 
    RowBox[{"c1", "\[Rule]", "1"}], ",", 
    RowBox[{"c2", "\[Rule]", "1"}], ",", 
    RowBox[{"c3", "\[Rule]", "1"}], ",", 
    RowBox[{"c4", "\[Rule]", "1"}], ",", 
    RowBox[{"t1", "\[Rule]", 
     RowBox[{"-", 
      FractionBox["1", "2"]}]}], ",", 
    RowBox[{"t2", "\[Rule]", 
     RowBox[{"-", 
      FractionBox["1", "2"]}]}], ",", 
    RowBox[{"t3", "\[Rule]", "1"}], ",", 
    RowBox[{"t4", "\[Rule]", 
     RowBox[{"-", 
      FractionBox["1", "2"]}]}]}], "}"}], "}"}]], "Output",
 CellChangeTimes->{{3.488077826190303*^9, 3.488077847077849*^9}, {
   3.488077912299794*^9, 3.488077935100554*^9}, {3.48807796999067*^9, 
   3.488078020255827*^9}, {3.4880782770045013`*^9, 3.488078338153759*^9}, 
   3.488078377433839*^9, 3.488079667673655*^9, 3.488079773629365*^9, {
   3.488079813694503*^9, 3.48807983846771*^9}, 3.488080032999311*^9, 
   3.4880915582590933`*^9}],

Cell[BoxData["False"], "Output",
 CellChangeTimes->{{3.488077826190303*^9, 3.488077847077849*^9}, {
   3.488077912299794*^9, 3.488077935100554*^9}, {3.48807796999067*^9, 
   3.488078020255827*^9}, {3.4880782770045013`*^9, 3.488078338153759*^9}, 
   3.488078377433839*^9, 3.488079667673655*^9, 3.488079773629365*^9, {
   3.488079813694503*^9, 3.48807983846771*^9}, 3.488080032999311*^9, 
   3.488091558346491*^9}],

Cell[BoxData["False"], "Output",
 CellChangeTimes->{{3.488077826190303*^9, 3.488077847077849*^9}, {
   3.488077912299794*^9, 3.488077935100554*^9}, {3.48807796999067*^9, 
   3.488078020255827*^9}, {3.4880782770045013`*^9, 3.488078338153759*^9}, 
   3.488078377433839*^9, 3.488079667673655*^9, 3.488079773629365*^9, {
   3.488079813694503*^9, 3.48807983846771*^9}, 3.488080032999311*^9, 
   3.488091558380867*^9}],

Cell[BoxData[
 RowBox[{"{", "}"}]], "Output",
 CellChangeTimes->{{3.488077826190303*^9, 3.488077847077849*^9}, {
   3.488077912299794*^9, 3.488077935100554*^9}, {3.48807796999067*^9, 
   3.488078020255827*^9}, {3.4880782770045013`*^9, 3.488078338153759*^9}, 
   3.488078377433839*^9, 3.488079667673655*^9, 3.488079773629365*^9, {
   3.488079813694503*^9, 3.48807983846771*^9}, 3.488080032999311*^9, 
   3.488091561982061*^9}],

Cell[BoxData[
 RowBox[{"{", "}"}]], "Output",
 CellChangeTimes->{{3.488077826190303*^9, 3.488077847077849*^9}, {
   3.488077912299794*^9, 3.488077935100554*^9}, {3.48807796999067*^9, 
   3.488078020255827*^9}, {3.4880782770045013`*^9, 3.488078338153759*^9}, 
   3.488078377433839*^9, 3.488079667673655*^9, 3.488079773629365*^9, {
   3.488079813694503*^9, 3.48807983846771*^9}, 3.488080032999311*^9, 
   3.48809157169035*^9}]
}, Open  ]],

Cell[CellGroupData[{

Cell[BoxData[
 RowBox[{
  RowBox[{"(*", " ", 
   RowBox[{"Theorem", " ", "5"}], " ", "*)"}], "\[IndentingNewLine]", 
  RowBox[{"(*", " ", 
   RowBox[{"First", " ", 
    RowBox[{"part", ":", " ", 
     RowBox[{"N24", " ", "does", " ", "not", " ", "exist"}]}]}], " ", "*)"}], 
  "\[IndentingNewLine]", 
  RowBox[{"(*", " ", 
   RowBox[{
    RowBox[{
    "To", " ", "get", " ", "a", " ", "Nash", " ", "equilibrium", " ", "N24", 
     " ", "we", " ", "need", " ", "that", " ", 
     RowBox[{"(", "AN24", ")"}], "_", "1"}], "<", 
    RowBox[{
     RowBox[{"(", "AN24", ")"}], "_", "2", " ", "and", " ", 
     RowBox[{"(", "AN24", ")"}], "_", "3"}], "<", 
    RowBox[{
     RowBox[{"(", "AN24", ")"}], "_", "2"}]}], " ", "*)"}], 
  "\[IndentingNewLine]", 
  RowBox[{"(*", " ", 
   RowBox[{
   "First", " ", "we", " ", "calculate", " ", "the", " ", "possible", " ", 
    "Nash", " ", "equilibrium", " ", "N24"}], " ", "*)"}], 
  "\[IndentingNewLine]", 
  RowBox[{
   RowBox[{"N24", "=", 
    RowBox[{"Part", "[", 
     RowBox[{
      RowBox[{
       RowBox[{"{", 
        RowBox[{"x1", ",", "x2", ",", "x3", ",", "x4"}], "}"}], "/.", 
       RowBox[{"Solve", "[", 
        RowBox[{
         RowBox[{"{", 
          RowBox[{
           RowBox[{
            RowBox[{"Part", "[", 
             RowBox[{
              RowBox[{"A", ".", 
               RowBox[{"{", 
                RowBox[{"x1", ",", "x2", ",", "x3", ",", "x4"}], "}"}]}], ",",
               "2"}], "]"}], "\[Equal]", 
            RowBox[{"Part", "[", 
             RowBox[{
              RowBox[{"A", ".", 
               RowBox[{"{", 
                RowBox[{"x1", ",", "x2", ",", "x3", ",", "x4"}], "}"}]}], ",",
               "4"}], "]"}]}], ",", 
           RowBox[{"x1", "\[Equal]", "0"}], ",", 
           RowBox[{"x3", "\[Equal]", "0"}], ",", 
           RowBox[{
            RowBox[{"x1", "+", "x2", "+", "x3", "+", "x4"}], "\[Equal]", 
            "1"}]}], "}"}], ",", 
         RowBox[{"{", 
          RowBox[{"x1", ",", "x2", ",", "x3", ",", "x4"}], "}"}]}], "]"}]}], 
      ",", "1"}], "]"}]}], "\[IndentingNewLine]", 
   RowBox[{"FindInstance", "[", 
    RowBox[{
     RowBox[{"{", 
      RowBox[{
       RowBox[{"e1", ">", "0"}], ",", 
       RowBox[{"e2", ">", "0"}], ",", 
       RowBox[{"e3", ">", "0"}], ",", 
       RowBox[{"e4", ">", "0"}], ",", 
       RowBox[{"c1", ">", "0"}], ",", 
       RowBox[{"c2", ">", "0"}], ",", 
       RowBox[{"c3", ">", "0"}], ",", 
       RowBox[{"c4", ">", "0"}], ",", 
       RowBox[{"t1", "<", "0"}], ",", 
       RowBox[{"t2", "<", "0"}], ",", 
       RowBox[{"t3", ">", "0"}], ",", 
       RowBox[{"t4", "<", "0"}], ",", 
       RowBox[{"sigma1", ">", "0"}], ",", 
       RowBox[{"sigma2", ">", "0"}], ",", 
       RowBox[{
        RowBox[{"e1", " ", "e2", " ", "t3"}], "<", 
        RowBox[{
         RowBox[{"-", "t1"}], " ", "c2", " ", "c3"}]}], ",", 
       RowBox[{
        RowBox[{"Part", "[", 
         RowBox[{
          RowBox[{"A", ".", "N24"}], ",", "1"}], "]"}], "<", 
        RowBox[{"Part", "[", 
         RowBox[{
          RowBox[{"A", ".", "N24"}], ",", "2"}], "]"}]}], ",", 
       RowBox[{
        RowBox[{"Part", "[", 
         RowBox[{
          RowBox[{"A", ".", "N24"}], ",", "3"}], "]"}], "<", 
        RowBox[{"Part", "[", 
         RowBox[{
          RowBox[{"A", ".", "N24"}], ",", "2"}], "]"}]}], ",", 
       RowBox[{
        RowBox[{"Det", "[", "A", "]"}], "<", "0"}], ",", 
       RowBox[{"e", ">", "c"}]}], "}"}], ",", 
     RowBox[{"{", 
      RowBox[{
      "e1", ",", "e2", ",", "e3", ",", "e4", ",", "c1", ",", "c2", ",", "c3", 
       ",", "c4", ",", "t1", ",", "t2", ",", "t3", ",", "t4"}], "}"}]}], 
    "]"}], "\[IndentingNewLine]", 
   RowBox[{"(*", " ", 
    RowBox[{
    "Again", " ", "we", " ", "use", " ", "the", " ", "command", " ", 
     "FindInstance", " ", "to", " ", "show", " ", "that", " ", "this", " ", 
     "system", " ", "of", " ", "inequalities", " ", "has", " ", "no", " ", 
     "solution", " ", "and", " ", "hence", " ", "N24", " ", "can", " ", 
     "never", " ", "be", " ", "a", " ", "Nash", " ", "equilibrium"}], " ", 
    "*)"}]}]}]], "Input",
 CellChangeTimes->{{3.4880802687663507`*^9, 3.48808030185603*^9}, {
  3.488081152568307*^9, 3.488081228764471*^9}, {3.488081272982545*^9, 
  3.4880813074097023`*^9}, {3.4880814062269993`*^9, 3.4880814434237823`*^9}, {
  3.488081495071776*^9, 3.488081627880662*^9}, {3.488082182008519*^9, 
  3.488082217419858*^9}, {3.488091689059813*^9, 3.488091696233583*^9}, {
  3.4880940102550364`*^9, 3.488094011050795*^9}}],

Cell[BoxData[
 RowBox[{"{", 
  RowBox[{"0", ",", 
   FractionBox["t4", 
    RowBox[{"t2", "+", "t4"}]], ",", "0", ",", 
   FractionBox["t2", 
    RowBox[{"t2", "+", "t4"}]]}], "}"}]], "Output",
 CellChangeTimes->{{3.488081434836851*^9, 3.488081438544129*^9}, {
   3.4880815482866077`*^9, 3.488081575999555*^9}, 3.488082219575531*^9, 
   3.488091531701964*^9, 3.488091574082652*^9, 3.488091709885277*^9}],

Cell[BoxData[
 RowBox[{"{", "}"}]], "Output",
 CellChangeTimes->{{3.488081434836851*^9, 3.488081438544129*^9}, {
   3.4880815482866077`*^9, 3.488081575999555*^9}, 3.488082219575531*^9, 
   3.488091531701964*^9, 3.488091574082652*^9, 3.4880917099693003`*^9}]
}, Open  ]],

Cell[CellGroupData[{

Cell[BoxData[
 RowBox[{
  RowBox[{"(*", " ", 
   RowBox[{"Second", " ", 
    RowBox[{"part", ":", " ", 
     RowBox[{
      RowBox[{
      "The", " ", "interior", " ", "Nash", " ", "equilibrium", " ", "has", 
       " ", "index"}], " ", "+", "1"}]}]}], " ", "*)"}], 
  "\[IndentingNewLine]", 
  RowBox[{"(*", " ", 
   RowBox[{
   "We", " ", "directly", " ", "apply", " ", "the", " ", "formula", " ", "as",
     " ", "stated", " ", "in", " ", "the", " ", "proof"}], " ", "*)"}], 
  "\[IndentingNewLine]", 
  RowBox[{"FindInstance", "[", 
   RowBox[{
    RowBox[{"{", 
     RowBox[{
      RowBox[{"e1", ">", "0"}], ",", 
      RowBox[{"e2", ">", "0"}], ",", 
      RowBox[{"e3", ">", "0"}], ",", 
      RowBox[{"e4", ">", "0"}], ",", 
      RowBox[{"c1", ">", "0"}], ",", 
      RowBox[{"c2", ">", "0"}], ",", 
      RowBox[{"c3", ">", "0"}], ",", 
      RowBox[{"c4", ">", "0"}], ",", 
      RowBox[{"t1", "<", "0"}], ",", 
      RowBox[{"t2", "<", "0"}], ",", 
      RowBox[{"t3", ">", "0"}], ",", 
      RowBox[{"t4", "<", "0"}], ",", 
      RowBox[{"sigma1", ">", "0"}], ",", 
      RowBox[{"sigma2", ">", "0"}], ",", 
      RowBox[{
       RowBox[{"e1", " ", "e2", " ", "t3"}], "<", 
       RowBox[{
        RowBox[{"-", "t1"}], " ", "c2", " ", "c3"}]}], ",", 
      RowBox[{
       RowBox[{"Det", "[", "An", "]"}], ">", "0"}], ",", 
      RowBox[{
       RowBox[{"Det", "[", "A", "]"}], "<", "0"}], ",", 
      RowBox[{"e", ">", "c"}]}], "}"}], ",", 
    RowBox[{"{", 
     RowBox[{
     "e1", ",", "e2", ",", "e3", ",", "e4", ",", "c1", ",", "c2", ",", "c3", 
      ",", "c4", ",", "t1", ",", "t2", ",", "t3", ",", "t4"}], "}"}]}], 
   "]"}]}]], "Input",
 CellChangeTimes->{{3.488080292771669*^9, 3.488080317095235*^9}, {
  3.4880940223606577`*^9, 3.4880940617853413`*^9}, {3.488094351891205*^9, 
  3.488094358883211*^9}}],

Cell[BoxData[
 RowBox[{"{", "}"}]], "Output",
 CellChangeTimes->{3.4880940634266043`*^9}]
}, Open  ]]
},
WindowSize->{1285, 694},
WindowMargins->{{-5, Automatic}, {Automatic, 0}},
PrintingCopies->1,
PrintingPageRange->{1, Automatic},
FrontEndVersion->"7.0 for Mac OS X x86 (32-bit) (November 10, 2008)",
StyleDefinitions->"Default.nb"
]
(* End of Notebook Content *)

(* Internal cache information *)
(*CellTagsOutline
CellTagsIndex->{}
*)
(*CellTagsIndex
CellTagsIndex->{}
*)
(*NotebookFileOutline
Notebook[{
Cell[545, 20, 3601, 105, 173, "Input"],
Cell[CellGroupData[{
Cell[4171, 129, 157, 3, 27, "Input"],
Cell[4331, 134, 803, 24, 77, "Output"]
}, Open  ]],
Cell[CellGroupData[{
Cell[5171, 163, 8461, 211, 223, "Input"],
Cell[13635, 376, 1122, 28, 47, "Output"],
Cell[14760, 406, 1125, 28, 46, "Output"],
Cell[15888, 436, 412, 6, 27, "Output"],
Cell[16303, 444, 412, 6, 27, "Output"],
Cell[16718, 452, 425, 7, 27, "Output"],
Cell[17146, 461, 424, 7, 27, "Output"]
}, Open  ]],
Cell[CellGroupData[{
Cell[17607, 473, 4535, 115, 148, "Input"],
Cell[22145, 590, 403, 9, 47, "Output"],
Cell[22551, 601, 257, 4, 27, "Output"]
}, Open  ]],
Cell[CellGroupData[{
Cell[22845, 610, 1827, 49, 73, "Input"],
Cell[24675, 661, 89, 2, 27, "Output"]
}, Open  ]]
}
]
*)

(* End of internal cache information *)
